# Supplementary material for: Collaboratively improved energy density and efficiency in NaNbO3-based lead-free relaxor ferroelectrics via enhancing antiferrodistortion
Source: Royal Society of Chemistry journal article supplement (doi:10.1039/d4ta00575a), 2024-01-01
Supplement: d4ta00575a1.pdf [file d4ta00575a1.pdf]

## Supporting Information

### **Collaboratively improved energy density and efficiency in NaNbO<sub>3</sub>-based lead-free relaxor ferroelectrics via enhancing antiferrodistortion**

Aiwen Xie, Junwei Lei, Yi Zhang, Attaur Rahman, Xuwen Jiang, Tianyu Li, Xinchun Xie,  
Liqiang Liu, Cong Zhou, Shuang Yin, Haiqiang Ma, Xia Fang, Ruzhong Zuo\*

Center for Advanced Ceramics, School of Materials Science and Engineering, Anhui  
Polytechnic University, Wuhu, 241000, P.R. China

\* Corresponding author: [zuoruzhong@ahpu.edu.cn](mailto:zuoruzhong@ahpu.edu.cn) (R.Z. Zuo)

**Table S1.** Comparison of the charge-discharge performances between the  $x = 0.04$  ceramic and some recently reported lead-free dielectric ceramics.

| Compositions                                                                                                                                                 | $P_D$ (MW/cm <sup>3</sup> ) | $W_D$ (J/cm <sup>3</sup> ) | $t_{0.9}$ (ns) | $E$ (kV/mm) | Ref.      |
|--------------------------------------------------------------------------------------------------------------------------------------------------------------|-----------------------------|----------------------------|----------------|-------------|-----------|
| Na <sub>0.7</sub> Bi <sub>0.1</sub> NbO <sub>3</sub>                                                                                                         | 62.5                        | 0.56                       | 155            | 10          | 1         |
| 0.92NaNbO <sub>3</sub> -0.08Bi(Mg <sub>0.5</sub> Ti <sub>0.5</sub> )O <sub>3</sub> +MnO <sub>2</sub>                                                         | 63.7                        | 1.17                       | 85             | 20          | 2         |
| 0.78NaNbO <sub>3</sub> -0.22Ba(Mg <sub>1/3</sub> Nb <sub>2/3</sub> )O <sub>3</sub>                                                                           | 47.6                        | 0.47                       | 45             | 14          | 3         |
| 0.68NaNbO <sub>3</sub> -0.32(Bi <sub>0.5</sub> Li <sub>0.5</sub> )TiO <sub>3</sub>                                                                           | 133.7                       | 3.83                       | 70             | 30          | 4         |
| 0.9NaNbO <sub>3</sub> -0.1Bi(Ni <sub>1/2</sub> Sn <sub>1/2</sub> )O <sub>3</sub>                                                                             | 100.5                       | 1.11                       | 43.6           | 20          | 5         |
| 0.85K <sub>0.5</sub> Na <sub>0.5</sub> NbO <sub>3</sub> -0.15(K <sub>0.7</sub> Bi <sub>0.3</sub> )NbO <sub>3</sub>                                           | 47.7                        | -                          | -              | 12          | 6         |
| 0.9(K <sub>0.5</sub> Na <sub>0.5</sub> )NbO <sub>3</sub> -0.1Bi(Zn <sub>2/3</sub> Nb <sub>1/3</sub> )O <sub>3</sub>                                          | 154                         | 2.5                        | -              | 25          | 7         |
| 0.91K <sub>0.5</sub> Na <sub>0.5</sub> NbO <sub>3</sub> -0.09SrZrO <sub>3</sub>                                                                              | -                           | 1.41                       | 126            | 25          | 8         |
| Mn-doped Ag <sub>0.97</sub> La <sub>0.01</sub> NbO <sub>3</sub>                                                                                              | 390                         | -                          | -              | 15          | 9         |
| Ag <sub>0.97</sub> Nd <sub>0.01</sub> NbO <sub>3</sub>                                                                                                       | 54                          | 0.56                       | 59.2           | 18          | 10        |
| 0.85Bi <sub>0.5</sub> K <sub>0.5</sub> TiO <sub>3</sub> -0.15Ba(Mg <sub>1/3</sub> Nb <sub>2/3</sub> )O <sub>3</sub>                                          | -                           | 0.49                       | 120            | 14          | 11        |
| 0.7(Na <sub>0.5</sub> Bi <sub>0.5</sub> ) <sub>0.7</sub> Sr <sub>0.3</sub> TiO <sub>3</sub> -<br>0.3Sr(Ti <sub>0.85</sub> Zr <sub>0.15</sub> )O <sub>3</sub> | 41.2                        | 1.17                       | 125.6          | 12          | 12        |
| 0.8Bi <sub>0.5</sub> Na <sub>0.5</sub> TiO <sub>3</sub> -0.2SrNb <sub>0.5</sub> Al <sub>0.5</sub> O <sub>3</sub>                                             | 131.75                      | -                          | -              | 30          | 13        |
| 0.93Na <sub>0.5</sub> Bi <sub>0.5</sub> TiO <sub>3</sub> -0.07LiTaO <sub>3</sub>                                                                             | 22                          | 0.52                       | 100            | 10          | 14        |
| 0.75Bi <sub>0.58</sub> Na <sub>0.42</sub> TiO <sub>3</sub> -0.25SrTiO <sub>3</sub>                                                                           | 147.04                      | 1.9                        | 118            | 30          | 15        |
| 0.5Na <sub>0.5</sub> Bi <sub>0.5</sub> TiO <sub>3</sub> -0.5Sr <sub>0.85</sub> Sm <sub>0.1</sub> TiO <sub>3</sub>                                            | 188.6                       | 1.5                        | 69             | 18          | 16        |
| 0.6(Bi <sub>0.5</sub> K <sub>0.5</sub> )TiO <sub>3</sub> -0.3BaTiO <sub>3</sub> -0.1NaNbO <sub>3</sub>                                                       | 103.2                       | 2.40                       | 130            | 22          | 17        |
| 0.57BiFeO <sub>3</sub> -0.33BaTiO <sub>3</sub> -0.10NaNbO <sub>3</sub>                                                                                       | -                           | 2.4                        | 97             | 20          | 18        |
| 0.70(0.67BiFeO <sub>3</sub> -0.33BaTiO <sub>3</sub> )-<br>0.30(Sr <sub>0.7</sub> Bi <sub>0.2</sub> )TiO <sub>3</sub>                                         | 14.46                       | 0.18                       | 250            | 10          | 19        |
| 0.7Ba <sub>0.85</sub> Ca <sub>0.15</sub> Zr <sub>0.1</sub> Ti <sub>0.9</sub> O <sub>3</sub> -0.3Sr <sub>0.7</sub> Bi <sub>0.2</sub> TiO <sub>3</sub>         | 237.83                      | 1.97                       | 103            | 30          | 20        |
| 0.62Sr <sub>0.7</sub> Bi <sub>0.2</sub> TiO <sub>3</sub> -0.38K <sub>0.5</sub> Bi <sub>0.5</sub> TiO <sub>3</sub>                                            | 49.5                        | 1.81                       | 360            | 22          | 21        |
| Sr <sub>0.35</sub> Bi <sub>0.35</sub> K <sub>0.25</sub> TiO <sub>3</sub> +Er <sub>2</sub> O <sub>3</sub>                                                     | 39.6                        | 1.51                       | 325            | 20          | 22        |
| Ca <sub>0.5</sub> Sr <sub>0.5</sub> Ti <sub>0.85</sub> Zr <sub>0.15</sub> O <sub>3</sub>                                                                     | 17.6                        | 0.19                       | 22             | 12          | 23        |
| 0.35BiFeO <sub>3</sub> -0.65SrTiO <sub>3</sub>                                                                                                               | 280                         | 3.3                        | 166            | 35          | 24        |
| $x = 0.04$                                                                                                                                                   | 340                         | 4.5                        | 27             | 37.5        | This work |

**Table S2.** Refined structural parameters of (0.9- $x$ )NN-0.1BT- $x$ BF ceramic powders.

| $x$  | Space group | Lattice parameters                                                        | $V$ (Å <sup>3</sup> ) | $R_{wp}$ (%) | $R_p$ (%) | $\chi^2$ |
|------|-------------|---------------------------------------------------------------------------|-----------------------|--------------|-----------|----------|
| 0    | $P2_1ma$    | a=5.4901(2), b=7.7609(2) Å, c=5.4890(1) Å, $\alpha=\beta=\gamma=90^\circ$ | 233.876(9)            | 5.90         | 3.92      | 3.81     |
| 0.04 | $P2_1ma$    | a=5.4995(2), b=7.7704(2) Å, c=5.4957(1) Å, $\alpha=\beta=\gamma=90^\circ$ | 234.852(12)           | 5.54         | 3.87      | 3.19     |

## References

- [1] M.X. Zhou, R.H. Liang, Z.Y. Zhou, X.L. Dong, Superior energy storage properties and excellent stability of novel NaNbO<sub>3</sub>-based lead-free ceramics with A-site vacancy obtained via a Bi<sub>2</sub>O<sub>3</sub> substitution strategy, *J. Mater. Chem. A* 2018, **6**, 17896-17904.
- [2] A. Tian, R.Z. Zuo, H. Qi, M. Shi, Large energy-storage density in transition-metal oxide modified NaNbO<sub>3</sub>-Bi(Mg<sub>1/2</sub>Ti<sub>2/3</sub>)O<sub>3</sub> lead-free ceramics through regulating antiferroelectric phase structure, *J. Mater. Chem. A* 2020, **8**, 8352-8359.
- [3] C.C. Sun, X.L. Chen, J.P. Shi, F.H. Pang, X.Y. Dong, H.Y. Chen, K.G. Wang, X.J. Zhou, H.F. Zhou, Simultaneously with large energy density and high efficiency achieved in NaNbO<sub>3</sub>-based relaxor ferroelectric ceramics, *J. Eur. Ceram. Soc.* 2021, **41**, 1891-1903.
- [4] A.W. Xie, R.Z. Zuo, Z.L. Qiao, Z.Q. Fu, T.F. Hu, L.F. Fei, NaNbO<sub>3</sub>-(Bi<sub>0.5</sub>Li<sub>0.5</sub>)TiO<sub>3</sub> lead-free relaxor ferroelectric capacitors with superior energy-storage performances via multiple synergistic design, *Adv. Energy Mater.* 2021, 2101378.
- [5] X.Y. Dong, X. Li, X. L. Chen, H.Y. Chen, C.C. Sun, J.P. Shi, F.H. Pang, H.F. Zhou, High energy storage density and power density achieved simultaneously in NaNbO<sub>3</sub>-based lead-free ceramics via antiferroelectricity enhancement, *J. Materiomics* 2021, **7**, 629-639.
- [6] M. Zhang, H.B. Yang, D. Li, Y. Lin, Excellent energy density and power density achieved in K<sub>0.5</sub>Na<sub>0.5</sub>NbO<sub>3</sub>-based ceramics with high optical transparency, *J. Alloy. Compd.* 2020, **829**, 154565.
- [7] Y. Huan, T. Wei, X.Z. Wang, X.M. Liu, P.Y. Zhao, X.H. Wang, Achieving ultrahigh energy storage efficiency in local-composition gradient-structured ferroelectric ceramics, *Chem. Eng. J.* 2021, **425**, 129506.

- [8] X.D. Ren, L. Jin, Z.H. Peng, B. Chen, X.S. Qiao, D. Wu, G.R. Li, H.L. Du, Z.P. Yang, X.L. Chao, Regulation of energy density and efficiency in transparent ceramics by grain refinement, *Chem. Eng. J.* 2020, **390**, 124566.
- [9] C.H. Xu, Z.Q. Fu, Z. Liu, L. Wang, S.G. Yan, X.F. Chen, F. Cao, X.L. Dong, G.S. Wang, La/Mn codoped AgNbO<sub>3</sub> lead-free antiferroelectric ceramics with large energy density and power density, *ACS Sustainable Chem. Eng.* 2018, **6**, 16151-16159.
- [10] P. Shi, X.J. Wang, X.J. Lou, C. Zhou, Q.D. Liu, L.Q. He, S. Yang, X.X. Zhang, Significantly enhanced energy storage properties of Nd<sup>3+</sup> doped AgNbO<sub>3</sub> lead-free antiferroelectric ceramics, *J. Alloy. Compd.* 2021, **877**, 160162.
- [11] F. Li, X. Hou, T.Y. Li, R.J. Si, C.C. Wang, J.W. Zhai, Fine-grain induced outstanding energy storage performance in novel Bi<sub>0.5</sub>K<sub>0.5</sub>TiO<sub>3</sub>-Ba(Mg<sub>1/3</sub>Nb<sub>2/3</sub>)O<sub>3</sub> ceramics via a hot-pressing strategy, *J. Mater. Chem. C* 2019, **7**, 12127-12138.
- [12] D. Li, Y. Lin, M. Zhang, H.B. Yang, Achieved ultrahigh energy storage properties and outstanding charge-discharge performances in (Na<sub>0.5</sub>Bi<sub>0.5</sub>)<sub>0.7</sub>Sr<sub>0.3</sub>TiO<sub>3</sub>-based ceramics by introducing a linear additive, *Chem. Eng. J.* 2020, **392**, 123729.
- [13] F. Yan, X.F. Zhou, X. He, H.R. Bai, S.H. Wu, B. Shen, J.W. Zhai, Superior energy storage properties and excellent stability achieved in environment-friendly ferroelectrics via composition design strategy, *Nano Energy* 2020, **75**, 105012.
- [14] L. Zhang, Y.P. Pu, M. Chen, T.C. Wei, X. Peng, Novel Na<sub>0.5</sub>Bi<sub>0.5</sub>TiO<sub>3</sub> based, lead-free energy storage ceramics with high power and energy density and excellent high-temperature stability, *Chem. Eng. J.* 2020, **383**, 123154.

- [15] F. Yan, K.W. Huang, T. Jiang, X.F. Zhou, Y.J. Shi, G.L. Ge, B. Shen, J.W. Zhai, Significantly enhanced energy storage density and efficiency of BNT-based perovskite ceramics via A-site defect engineering, *Energy Storage Mater.* 2020, **30**, 392-400.
- [16] D. Li, D. Zhou, W.Y. Liu, P.J. Wang, Y. Guo, X.G. Yao, H.X. Lin, Enhanced energy storage properties achieved in  $\text{Na}_{0.5}\text{Bi}_{0.5}\text{TiO}_3$ -based ceramics via composition design and domain engineering, *Chem. Eng. J.* 2021, **419**, 129601.
- [17] L. Chen, F.X. Long, H. Qi, H. Liu, S.Q. Deng, J. Chen, Outstanding energy storage performance in high-hardness  $(\text{Bi}_{0.5}\text{K}_{0.5})\text{TiO}_3$ -based lead-free relaxors via multi-scale synergistic design, *Adv. Funct. Mater.* 2021, 2110478.
- [18] H. Qi, A.W. Xie, A. Tian, R.Z. Zuo, Superior energy-storage capacitors with simultaneously giant energy density and efficiency using nanodomain engineered  $\text{BiFeO}_3$ - $\text{BaTiO}_3$ - $\text{NaNbO}_3$  lead-free bulk ferroelectrics, *Adv. Energy Mater.* 2019, 1903338.
- [19] Z.T. Chen, X.Y. Bu, B.X. Ruan, J. Du, P. Zheng, L.L. Li, F. Wen, W.F. Bai, W. Wu, L. Zheng, Y. Zhang, Simultaneously achieving high energy storage density and efficiency under low electric field in  $\text{BiFeO}_3$ -based lead-free relaxor ferroelectric ceramics, *J. Eur. Ceram. Soc.* 2020, **40**, 5450-5457.
- [20] C. Shi, F. Yan, G.L. Ge, Y.Q. Wei, J.W. Zhai, W. Yao, Significantly enhanced energy storage performances and power density in  $(1-x)\text{BCZT-xSBT}$  lead-free ceramics via synergistic optimization strategy, *Chem. Eng. J.* 2021, **426**, 130800.
- [21] P. Zhao, B. Tang, Z.X. Fang, F. Si, C.T. Yang, G. Liu, S.R. Zhang, Structure, dielectric and relaxor properties of  $\text{Sr}_{0.7}\text{Bi}_{0.2}\text{TiO}_3$ - $\text{K}_{0.5}\text{Bi}_{0.5}\text{TiO}_3$  lead-free ceramics for energy storage applications, *J. Materiomics* 2021, **7**, 195-207.

- [22] P. Zhao, B. Tang, Z.X. Fang, F. Si, C.T. Yang, S.R. Zhang, Improved dielectric breakdown strength and energy storage properties in  $\text{Er}_2\text{O}_3$  modified  $\text{Sr}_{0.35}\text{Bi}_{0.35}\text{K}_{0.25}\text{TiO}_3$ , *Chem. Eng. J.* 2021, **403**, 126290.
- [23] Y.P. Pu, W. Wang, X. Guo, R.K. Shi, M.D. Yang, J.W. Li, Enhancing the energy storage properties of  $\text{Ca}_{0.5}\text{Sr}_{0.5}\text{TiO}_3$ -based lead-free linear dielectric ceramics with excellent stability through regulating grain boundary defects, *J. Mater. Chem. C* 2019, **7**, 14384-14393.
- [24] F. Yan, H.R. Bai, G.L. Ge, J.F. Lin, C. Shi, K. Zhu, B. Shen, J.W. Zhai, S.J. Zhang, Composition and structure optimized  $\text{BiFeO}_3$ - $\text{SrTiO}_3$  lead-free ceramics with ultrahigh energy storage performance, *Small* 2022, 2106515.
